# Supplementary material for: Investigation on a Zr-based metal–organic framework (MOF-801) for the high-performance separation of light alkanes
Source: Royal Society of Chemistry journal article supplement (doi:10.1039/d1cc05306j), 2021-01-01
Supplement: d1cc05306j1.pdf [file d1cc05306j1.pdf]

## Electronic Support Information

### Investigation on Zr-based metal-organic framework (MOF-801) for high-performance separation of light alkanes

Hao Liu <sup>a, b, †</sup>, Boran Li <sup>a, c, †</sup>, Yayun Zhao <sup>a, b\*</sup>, Chunlong Kong <sup>a</sup>, Chen Zhou <sup>a</sup>, Yichao Lin <sup>a, b</sup>, Ziqi Tian <sup>a, b\*</sup> and Liang Chen <sup>a, b\*</sup>

<sup>a</sup> Institute of New Energy Technology, Ningbo Institute of Materials Technology and Engineering, CAS, 1219 Zhongguan Road, 315201, Ningbo, P. R. China

<sup>b</sup> University of Chinese Academy of Sciences, 100049, Beijing, P. R. China

<sup>c</sup> Beijing University of Chemical Technology, 100010, Beijing, P. R. China

<sup>†</sup> Both authors contributed equally to this work.

[\\*zhaoyayun@nimte.ac.cn](mailto:zhaoyayun@nimte.ac.cn); [tianziqi@nimte.ac.cn](mailto:tianziqi@nimte.ac.cn); [chengliang@nimte.ac.cn](mailto:chengliang@nimte.ac.cn)

## Materials

All chemicals were obtained commercially and used without further purification: zirconyl chloride octahydrate ( $\text{ZrOCl}_2 \cdot 8\text{H}_2\text{O}$ , Aladdin,  $\geq 98.0\%$ ), fumaric acid ( $\text{H}_2\text{fum}$ , Aladdin,  $\geq 99.0\%$ ), *N, N*-dimethylformamide (DMF, Aladdin,  $\geq 99.5\%$ ), formic acid (FA, Aladdin,  $\geq 99.0\%$ ).

## Characterization

SEM was conducted on a Hitachi S-4800 instrument with a cold field emission gun operating at 4 kV and 7  $\mu\text{A}$ . The data of XRD on Bruker D8 Advance was collected at room temperature under ambient pressure using Cu K $\alpha$  ( $\lambda = 1.5406 \text{ \AA}$ ) radiation at 5-40°. TGA was carried out on Perkin-Elmer heating from 40 °C to 800 °C at a rate of 5 °C/min in nitrogen atmosphere.

## Gas sorption

The  $\text{N}_2$  adsorption-desorption isotherms of the samples at -196 °C were measured on the Micrometrics ASPS 2020. Upon calculation based on the  $\text{N}_2$  adsorption isotherm, the BET surface area and the pore size distribution can be obtained using the BET equation and the Horvath-Kawazoe method, respectively. The  $\text{CH}_4$ ,  $\text{C}_2\text{H}_6$  and  $\text{C}_3\text{H}_8$  single-component adsorption isotherms were collected on Micrometrics ASAP 2020 as well at 0 °C and 25 °C. Prior to each measurement, the sample was activated at 150 °C under vacuum for 6 h.

## Breakthrough experiment

The breakthrough experiment was completed employing a fixed bed. Before test, MOF-801 sample was heated in a dynamic inoculation drier at 150 °C for 2 h

accompanied by He flow (50 mL/min) for activation. Then, 1.4 g of activated crystal MOF-801 was loaded onto a stainless steel column with an inner diameter of 1 cm and a packing length of 9 cm. CH<sub>4</sub>/C<sub>2</sub>H<sub>6</sub>/C<sub>3</sub>H<sub>8</sub> mixture (85/10/5, v/v/v) was introduced into the adsorption column at a rate of 10 mL/min. The mass spectrometer (BSD-MAD) was used to determine the composition of the cuvette exit gas stream. The temperature of the cuvette was controlled by an incubator and the breakthrough curves were obtained at 25 °C and 1 bar.

### **Synthesis of MOF-801**

MOF-801 was obtained following the same procedure as reported elsewhere.<sup>[1]</sup> Typically, ZrOCl<sub>2</sub>·8H<sub>2</sub>O (2.8 mmol, 0.92 g), H<sub>2</sub>fum (2.8 mmol, 0.32g) and FA (280 mmol, 10.6 mL) were dissolved in 72 mL DMF in a 200 mL breaker, and the mixture was stirred for 30 min before transferring to the Teflon-lined autoclave. Then, the Teflon-lined autoclave was kept in an oven at 100 °C for 24 h under static conditions. After cooling down to room temperature, the obtained crystals were collected by centrifugation with 8000 rpm/min. The as-synthesized sample was washed with DMF several times. Finally, the product was dried in an oven at 120 °C for 24 h. Calculated on the basis of H<sub>2</sub>fum, the white nano-crystals of MOF-801 were obtained in 93 % yield (0.60 g).

### **Simulation Details**

The GCMC simulations were performed to simulate gas isotherms and adsorption heat by using RASPA code.<sup>[2]</sup> MOF-801 model and force fields parameters are from Iacomi et al.,<sup>[3]</sup> as shown in Table S1. Lorentz-Berthelot mixing-rule was

applied to calculate the crossing interaction parameters with cutoff of 15 Å. The long-range electrostatic interaction was solved by Ewald summation with a precision of  $1 \times 10^{-6}$ . The simulations consist of  $3 \times 10^5$  Monte Carlo (MC) cycles, where first  $1 \times 10^5$  MC cycles was used for equilibration. The Peng-Robinson equation of state was applied to transform pressure to fugacity. The MC trial moves considering translation, rotation, and reinsertion were used in all adsorption simulations.

#### Calculation of isosteric enthalpy of adsorption <sup>[4]</sup>

The isosteric enthalpies of these light hydrocarbons were calculated by the Clausius-Clapeyron equation:

$$Q_d = \frac{RT^2}{p} \left( \frac{\partial p}{\partial T} \right)_q$$

Where  $Q_d$  is the isosteric enthalpy of adsorption (kJ/mol),  $R$  is the gas constant [kJ/(mol·K)],  $T$  is the adsorption temperature (K), and  $p$  is the adsorption pressure (kPa).

#### IAST calculation of C<sub>3</sub>H<sub>8</sub>/CH<sub>4</sub> and C<sub>2</sub>H<sub>6</sub>/CH<sub>4</sub> on MOF-801 <sup>[5]</sup>

The adsorption selectivity factor  $S$  can be estimated by using following equation:

$$S = x_1 y_2 / (x_2 y_1)$$

Where  $S$  is the adsorption selectivity factor,  $x_i$  and  $y_i$  represent the mole fraction of component  $i$  ( $i = 1$  or  $2$ ) in the adsorbed and gas phase. Here, component 1 represents C<sub>3</sub>H<sub>8</sub> or C<sub>2</sub>H<sub>6</sub>, and component 2 represents CH<sub>4</sub>.

The adsorption isotherm of pure gas is fitted by the single-site Langmuir model:

$$q = a \frac{bp^c}{1 + bp^c}$$

Where  $q$  is the gas amount adsorbed per gram of adsorbent (mmol/g),  $p$  is the equilibrium pressure of pure gas with the adsorbed phase (kPa),  $a$  is the saturation capacities of site 1,  $b$  is the affinity coefficients of site 1 (1/kPa),  $\frac{1}{c}$  represents the corresponding deviations from an ideal homogeneous surface.

**Table S1** Force field parameters for MOF-801 and adsorbates.

| Atom type                        | $\epsilon/k_b$ (K) | $\sigma$ (Å) |
|----------------------------------|--------------------|--------------|
| Zr                               | 52.9               | 3.85         |
| O                                | 27.0               | 2.80         |
| C                                | 79.0               | 3.05         |
| H                                | 34.7               | 3.66         |
| CH <sub>4</sub> _sp <sup>3</sup> | 148.0              | 3.73         |
| CH <sub>3</sub> _sp <sup>3</sup> | 108.0              | 3.76         |
| CH <sub>2</sub> _sp <sup>3</sup> | 56.0               | 3.96         |

**Table S2** Comparison of adsorption and separation performance of some reported materials at 1 bar.

| materials                           | C <sub>2</sub> H <sub>6</sub> | C <sub>3</sub> H <sub>8</sub> |                                                |                                                | Temperatur | Ref.      |
|-------------------------------------|-------------------------------|-------------------------------|------------------------------------------------|------------------------------------------------|------------|-----------|
|                                     | (mmol/g )                     | (mmol/g )                     | C <sub>2</sub> H <sub>6</sub> /CH <sub>4</sub> | C <sub>3</sub> H <sub>8</sub> /CH <sub>4</sub> | e (°C)     |           |
| MOF-801                             | 2.26                          | 3.02                          | 28                                             | 255                                            | 25         | This work |
| MFM-202a                            | 4.21                          | 6.76                          | 10                                             | 87                                             | 20         | [6]       |
| Ni(TMBDC)<br>(DABCO) <sub>0.5</sub> | 5.51                          | 5.73                          | 29                                             | 247                                            | 25         | [7]       |
| NKM-101a                            | 2.92                          | 3.43                          | 20                                             | 223                                            | 23         | [8]       |
| USTA-35a                            | 2.43                          | 3.29                          | 8                                              | 80                                             | 25         | [9]       |
| PAF-40                              | 1.95                          | 2.39                          | 15                                             | 48                                             |            |           |
| PAF-40-Fe                           | 1.85                          | 2.58                          | 16                                             | 56                                             | 25         | [10]      |
| PAF-40-Mn                           | 2.05                          | 2.51                          | 31                                             | 246                                            |            |           |
| JUC-100                             | 4.11                          | 6.07                          | 8                                              | 65                                             | 25         | [11]      |
| UPC-98                              | 2.03                          | 4.34                          | 15                                             | 118                                            | 25         | [5b]      |

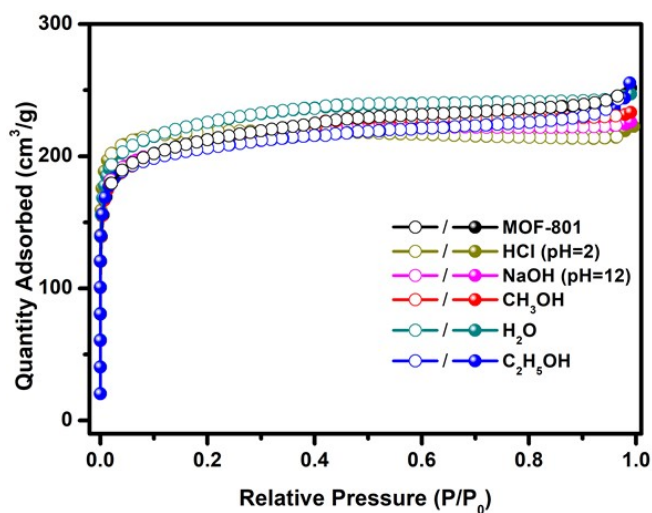

**Fig. S1** N<sub>2</sub> adsorption-desorption isotherms of MOF-801 at -196 °C before and after different treatments.

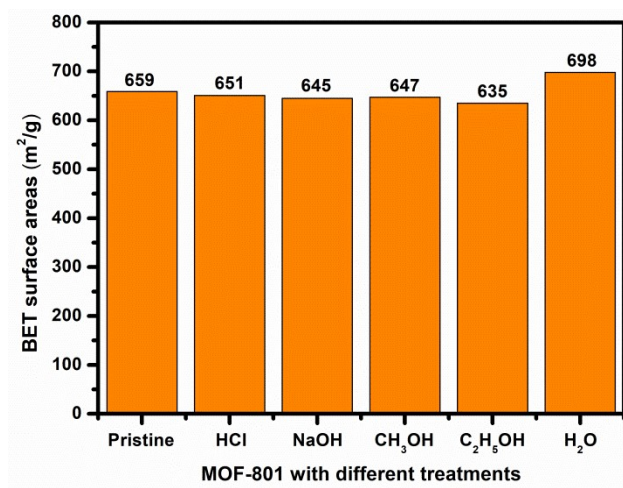

**Fig. S2** BET surface areas of MOF-801 samples before and after different treatments (CH<sub>3</sub>OH, C<sub>2</sub>H<sub>5</sub>OH, H<sub>2</sub>O, HCl aqueous solution (pH = 2), and NaOH aqueous solution (pH = 12)).

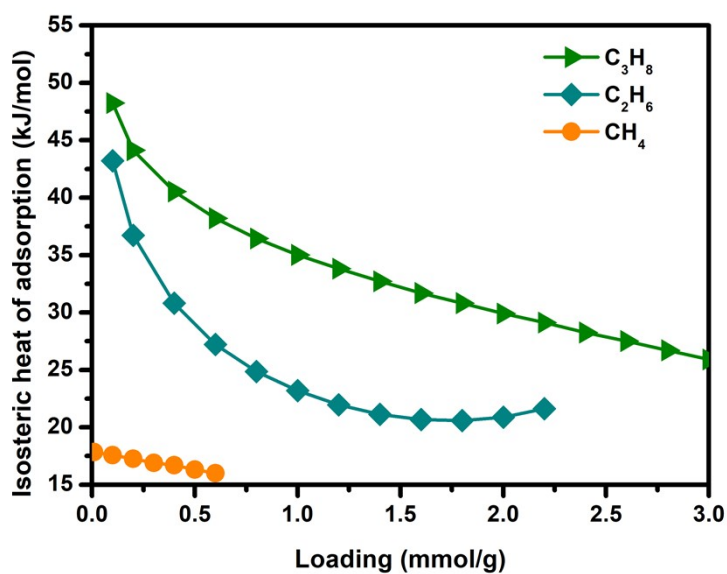

**Fig. S3** Isosteric enthalpies of CH<sub>4</sub>, C<sub>2</sub>H<sub>6</sub> and C<sub>3</sub>H<sub>8</sub> adsorption on MOF-801. “These data points are calculated according to the Clausius-Clapeyron equation and linked by lines to guide the reader.”

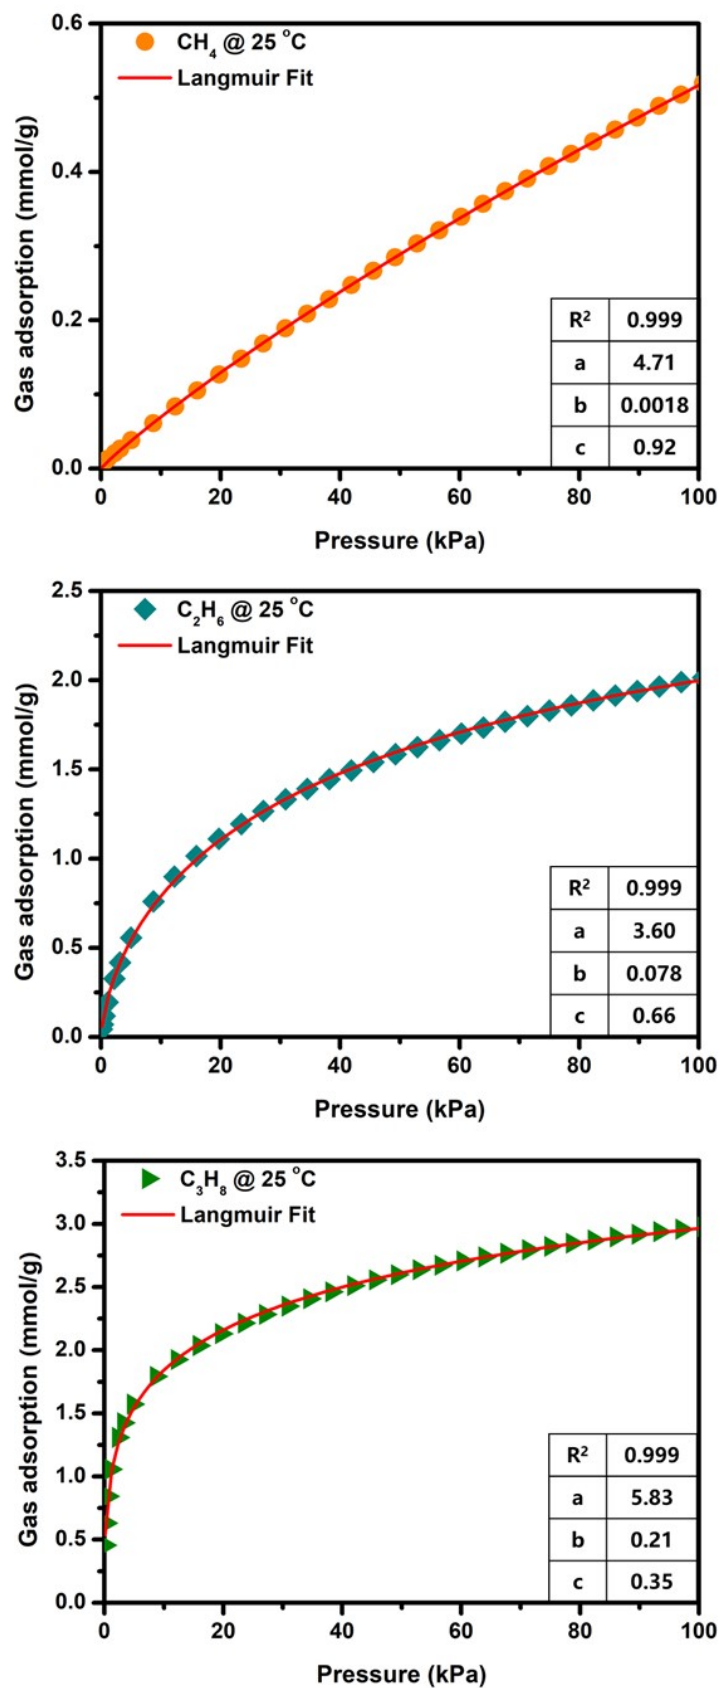

**Fig. S4** CH<sub>4</sub>, C<sub>2</sub>H<sub>6</sub> and C<sub>3</sub>H<sub>8</sub> adsorption isotherms of MOF-801 at 25 °C with fitting by Langmuir model.



## References

- 1 H. Furukawa, F. Gandara, Y. B. Zhang, J. Jiang, W. L. Queen, M. R. Hudson, O. M. Yaghi, *J. Am. Chem. Soc.*, 2014, **136**, 4369-4381.
- 2 D. Dubbeldam, S. Calero, D. E. Ellis, R. Q. Snurr, *Mol. Simulat.*, 2016, **42**, 81-101.
- 3 P. Iacomi, F. Formalik, J. Marreiros, J. Shang, J. Rogacka, A. Mohmeyer, P. Behrens, R. Ameloot, B. Kuchta, P. L. Llewellyn, *Chem. Mater.*, 2019, **31**, 8413-8423.
- 4 (a) L. Czepirski, J. Jagiełło, *Chem. Eng. Sci.*, 1989, **44**, 797-801; (b) R. Krishna, *Chem. Eng. Sci.*, 2015, **123**, 191-196.
- 5 (a) A. L. Myers, J. M. Prausnitz, *AIChE J.*, 1965, **11**, 121-127; (b) X. Wang, X. Wang, X. Zhang, W. Fan, Q. Li, W. Jiang, F. Dai, D. Sun, *Cryst. Growth Des.*, 2020, **20**, 5670-5675.
- 6 S. Gao, C. G. Morris, Z. Lu, Y. Yan, H. G. W. Godfrey, C. Murray, C. C. Tang, K. M. Thomas, S. Yang, M. Schröder, *Chem. Mater.*, 2016, **28**, 2331-2340.
- 7 Y. Wu, Z. Liu, J. Peng, X. Wang, X. Zhou, Z. Li, *ACS Appl. Mater. Inter.*, 2020, **12**, 51499-51505.
- 8 Y. Qiao, X. Chang, J. Zheng, M. Yi, Z. Chang, M. H. Yu, X. H. Bu, *Inorg. Chem.*, 2021, **60**, 2749-2755.
- 9 Y. He, Z. Zhang, S. Xiang, F. R. Fronczek, R. Krishna, B. Chen, *Chem. Commun.*, 2012, **48**, 6493-6495.
- 10 S. Meng, H. Ma, L. Jiang, H. Ren, G. Zhu, *J. Mater. Chem. A*, 2014, **2**, 14536-14541.
- 11 J. Jia, L. Wang, F. Sun, X. Jing, Z. Bian, L. Gao, R. Krishna, G. Zhu, *Chem. Eur. J.*, 2014, **20**, 9073-9080.
